# Supplementary material
Source: Springer Nature journal article supplement (https://www.springermedizin.de/resource/supplementary/12885_2013_4137_MOESM1_ESM.pdf/9465540)

# Karpas 299 parental cell

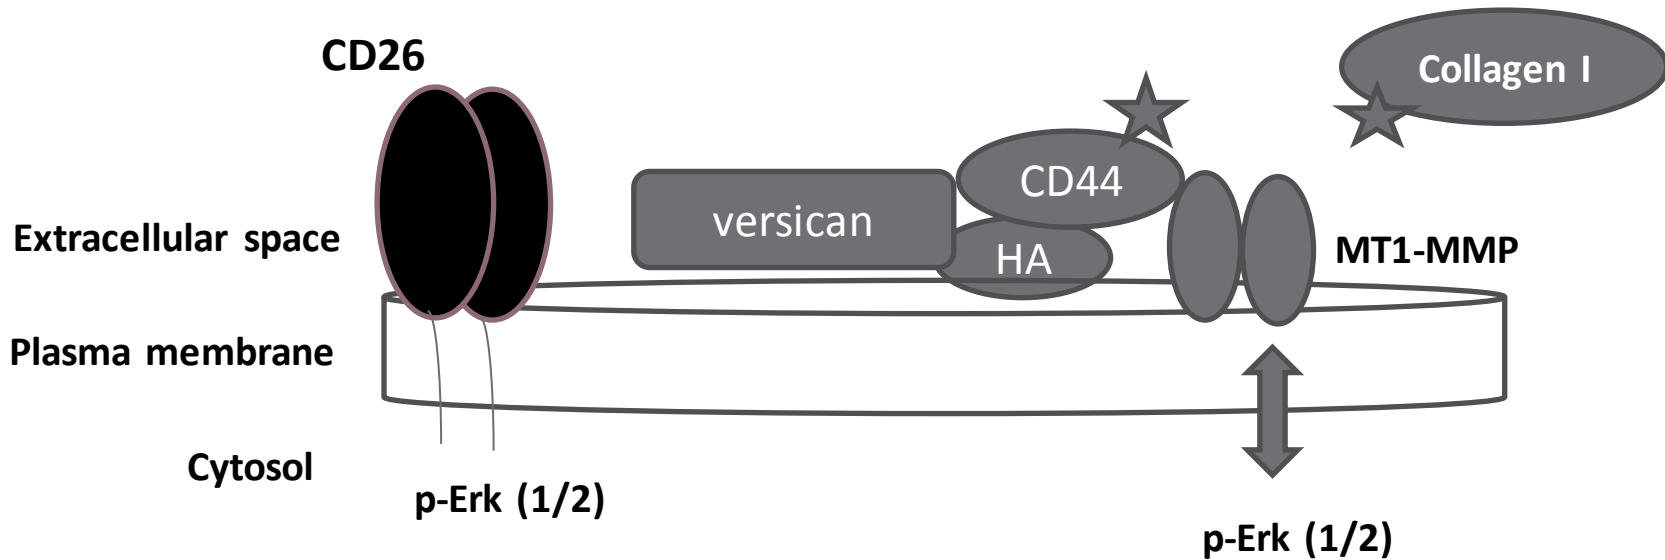

Supplement: MOESM1 [file 9465540]
